# Supplementary material for: Rapid Plasma Electrolytic Oxidation Synthesis of Intermetallic PtBi/MgO/Mg Monolithic Catalyst for Efficient Removal of Organic Pollutants
Source: MDPI journal article supplement (doi:10.3390/ma17030605), 2024-01-26
Supplement: s1 [file s1]

Article

# Rapid Plasma Electrolytic Oxidation Synthesis of Intermetallic PtBi/MgO/Mg Monolithic Catalyst for Efficient Removal of Organic Pollutants

Jiayi Rong <sup>†</sup>, Mengyang Li <sup>†</sup>, Feng Cao <sup>\*</sup>, Qianwei Wang, Mingran Wang, Yang Cao, Jun Zhou and Gaowu Qin <sup>\*</sup>

Key Lab for Anisotropy and Texture of Materials (MoE), School of Materials Science and Engineering, Northeastern University, Shenyang 110819, China; 2210214@stu.neu.edu.cn (J.R.); 2310170@stu.neu.edu.cn (M.L.); 2270554@stu.neu.edu.cn (Q.W.); 2200639@stu.neu.edu.cn (M.W.); 2270359@stu.neu.edu.cn (Y.C.); hafouniu@126.com (J.Z.)

<sup>\*</sup> Correspondence: caof@atm.neu.edu.cn (F.C.); qingw@smm.neu.edu.cn (G.Q.)

<sup>†</sup> These authors contributed equally to this work.

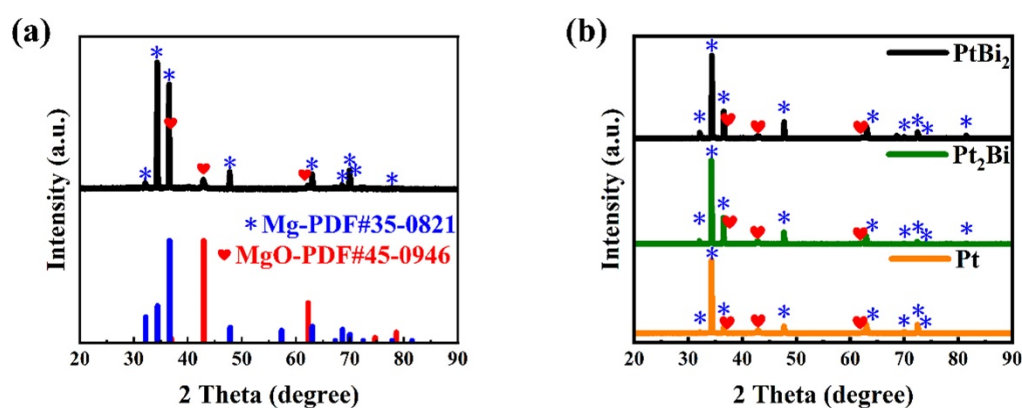

**Figure S1.** XRD patterns of (a) hcp-PtBi/MgO/Mg monolithic catalyst, (b) PtBi<sub>2</sub>/MgO/Mg, Pt<sub>2</sub>Bi/MgO/Mg and Pt/MgO/Mg mono-lithic catalysts. The blue \* symbol presents the characteristic peak of Mg-PDF#35-0821. The red ♥ symbol presents the characteristic peak of MgO-PDF#45-0946.

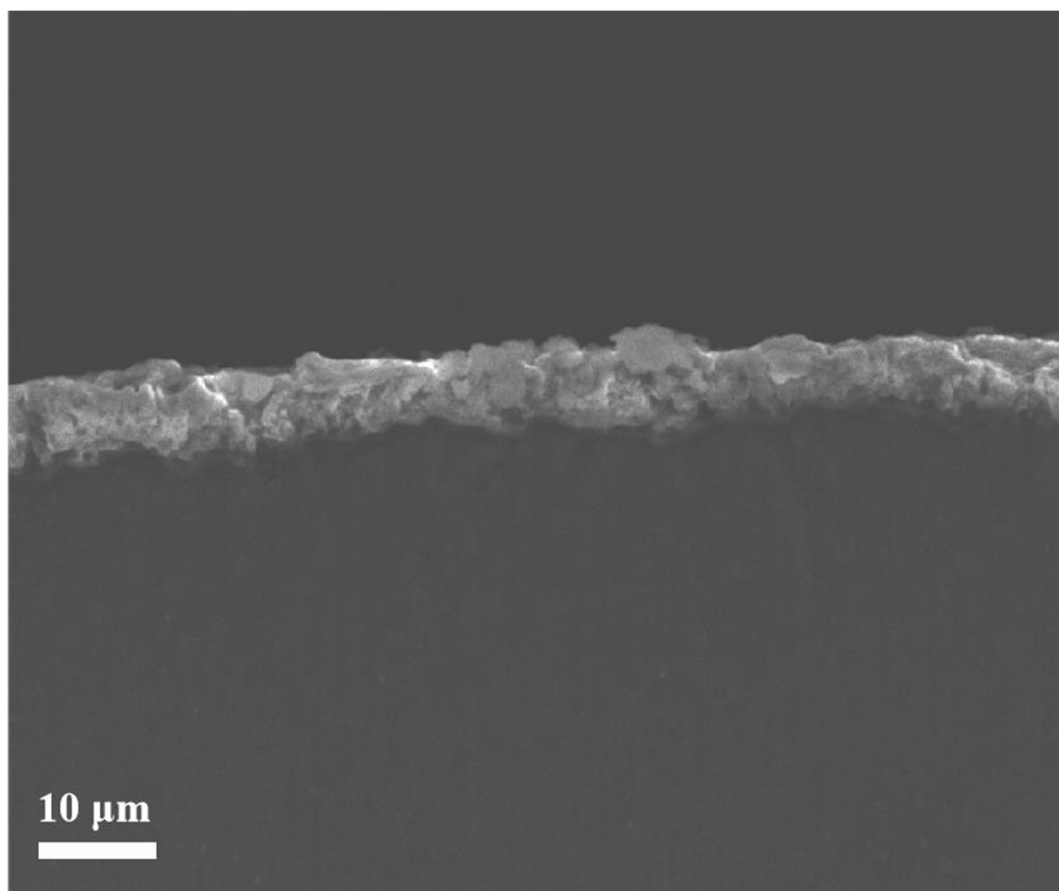

**Figure S2.** Low-magnification SEM cross-sectional image of the intermetallic PtBi/MgO/Mg.

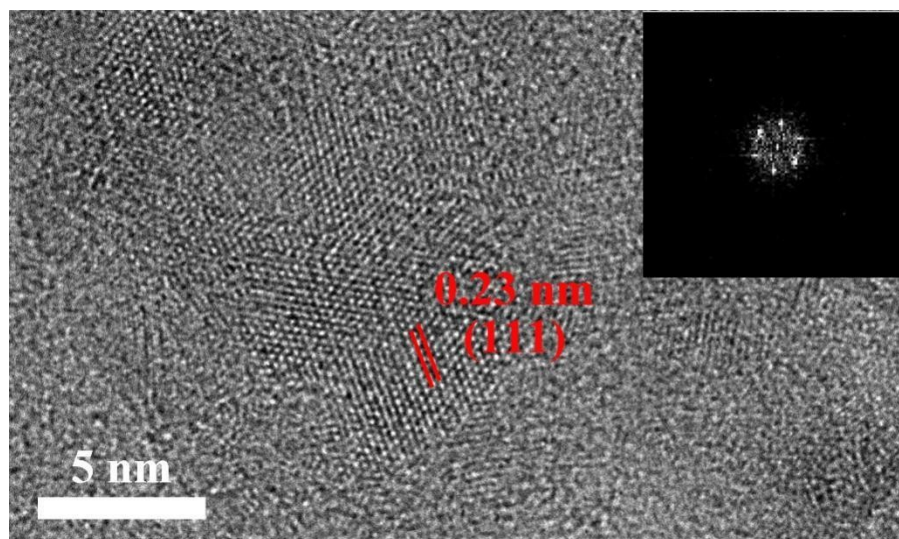

**Figure S3.** HRTEM image of fcc-Pt/MgO/Mg NPs; and the inset is the corresponding FFT pattern.

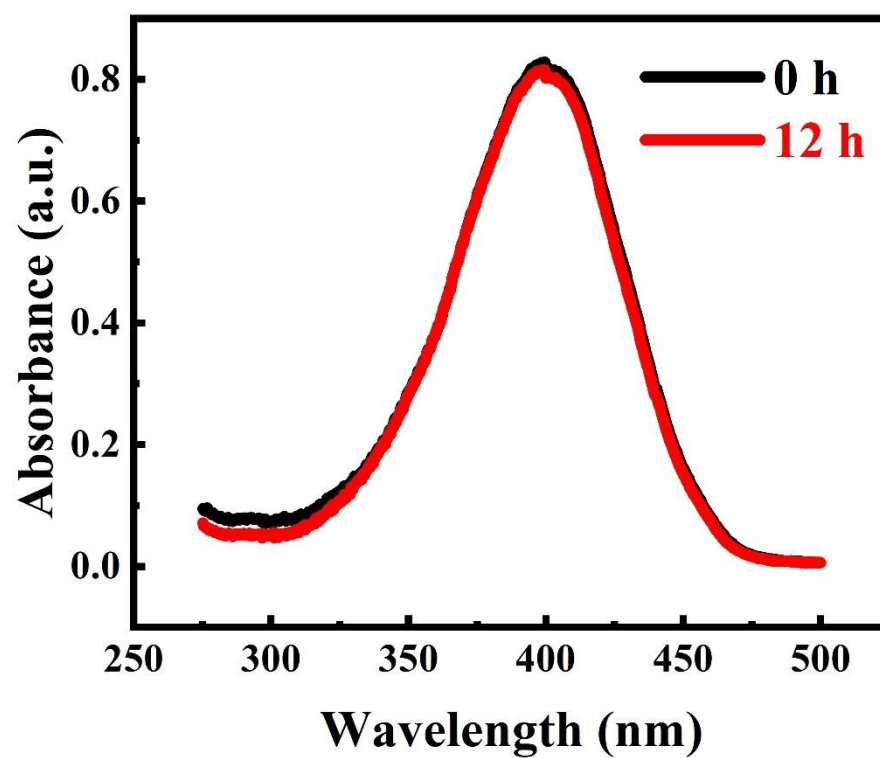

**Figure S4.** Time-dependent UV-visible absorption spectra of 4-NP catalytic removal without any catalyst.

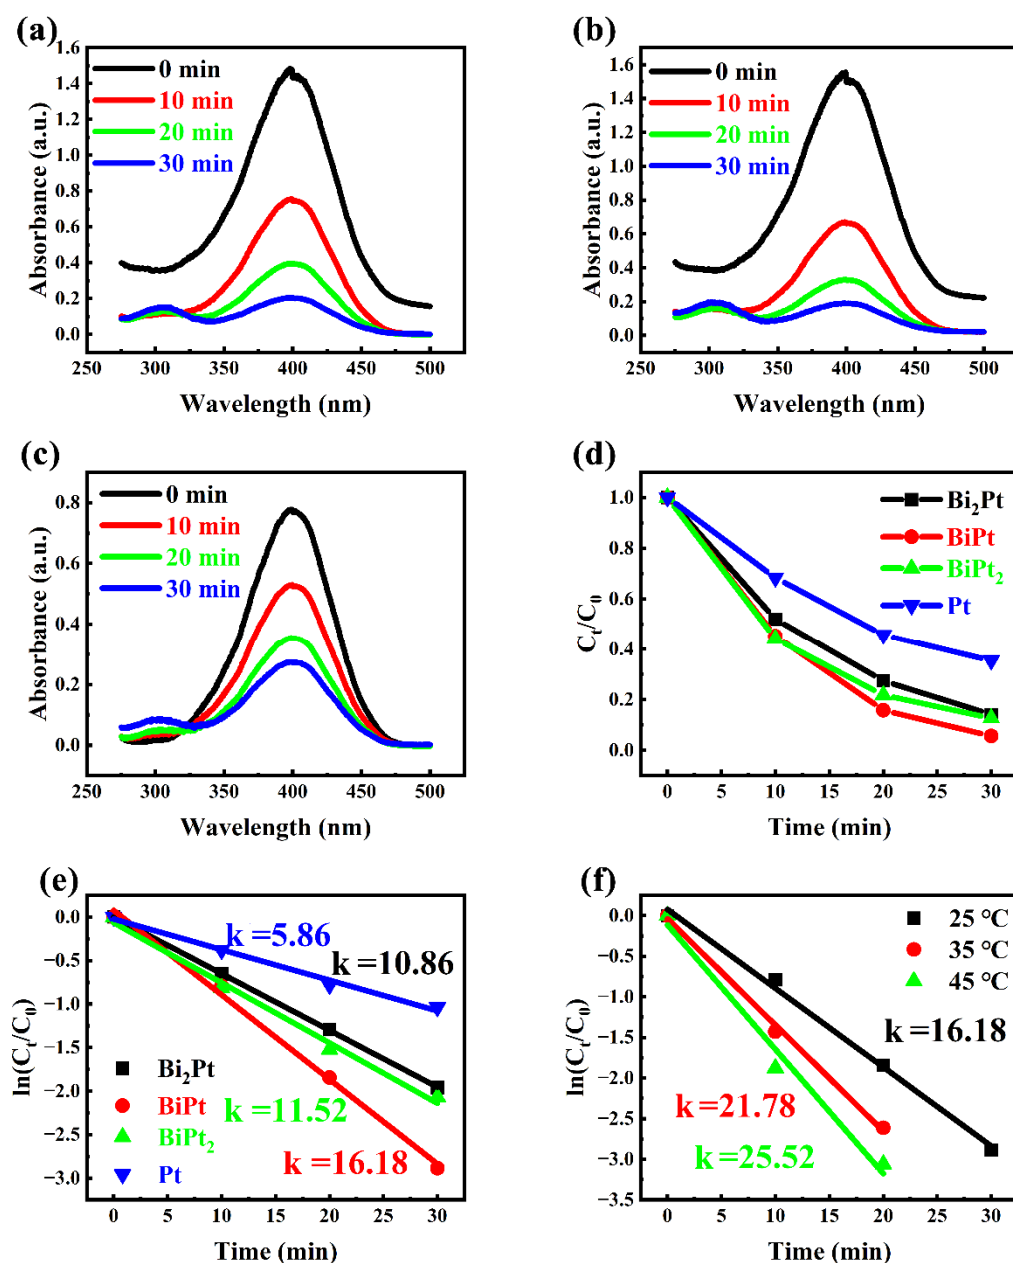

**Figure S5.** Time-dependent UV-visible absorption spectra of 4-NP catalytic removal by PtBi/MgO/Mg monolithic catalyst with di-verse metal ratios:(a) PtBi<sub>2</sub>; (b) Pt<sub>2</sub>Bi; (c) Pt. (d) Rate curve and linear fitting kinetic curve of 4-NP catalytic removal (e) by catalysts with diverse metal ratios of Pt and Bi; (f) by hcp-PtBi/MgO/Mg monolithic catalyst at diverse temperatures.

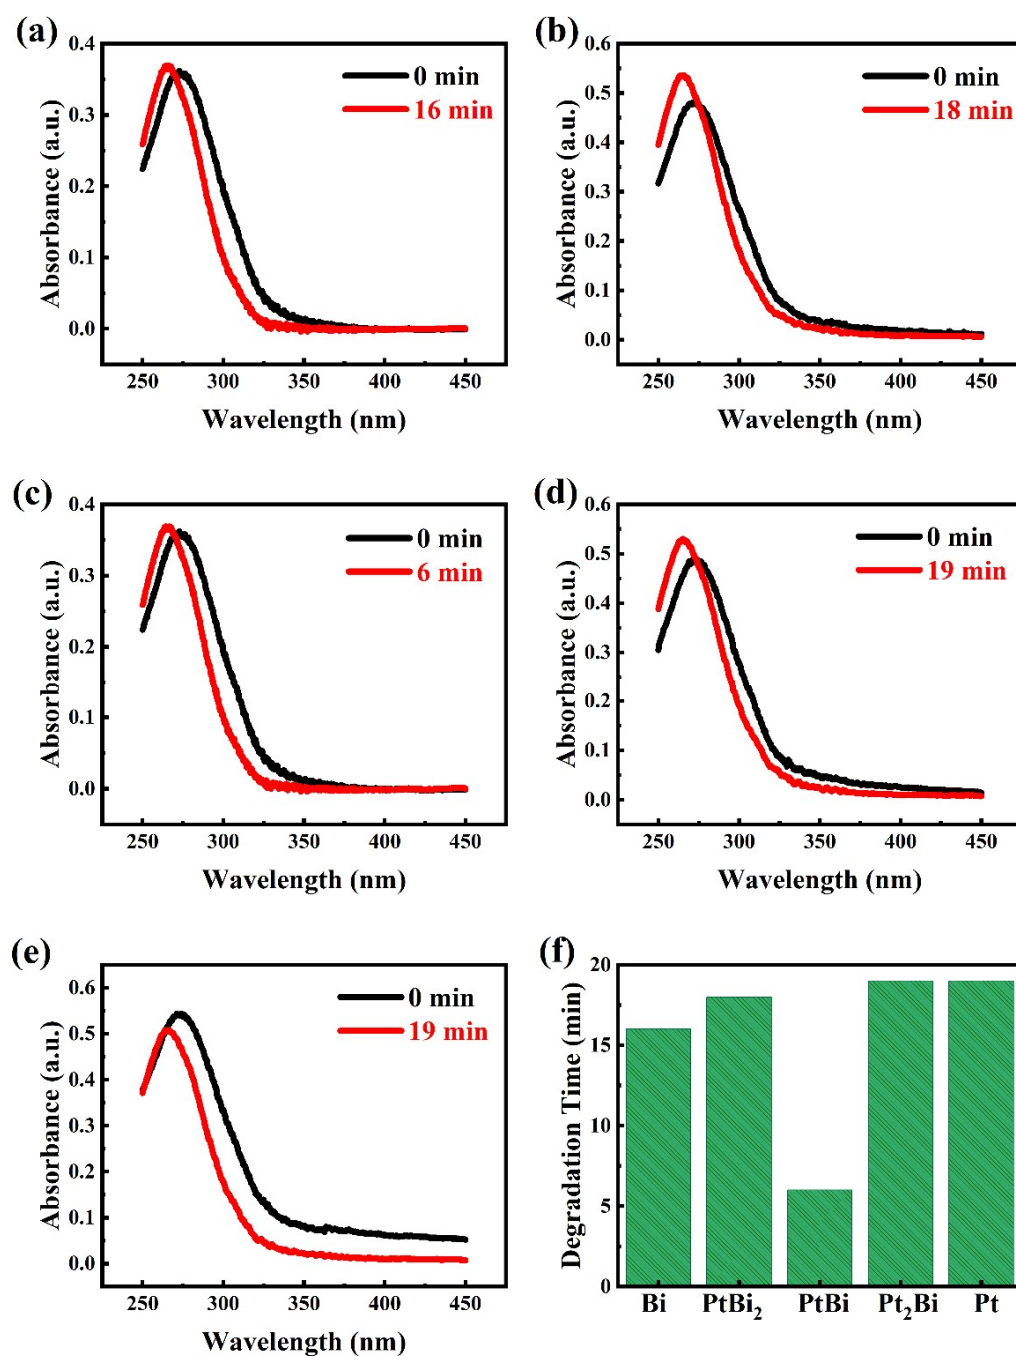

**Figure S6.** Time-dependent UV-visible absorption spectra of p-NBA catalytic removal by PtBi/MgO/Mg monolithic catalyst with diverse metal ratios: (a) Bi; (b) PtBi<sub>2</sub>; (c) PtBi; (d) Pt<sub>2</sub>Bi; (e) Pt. (f) Degradation time of MO catalytic removal by catalysts with diverse metal ratios.

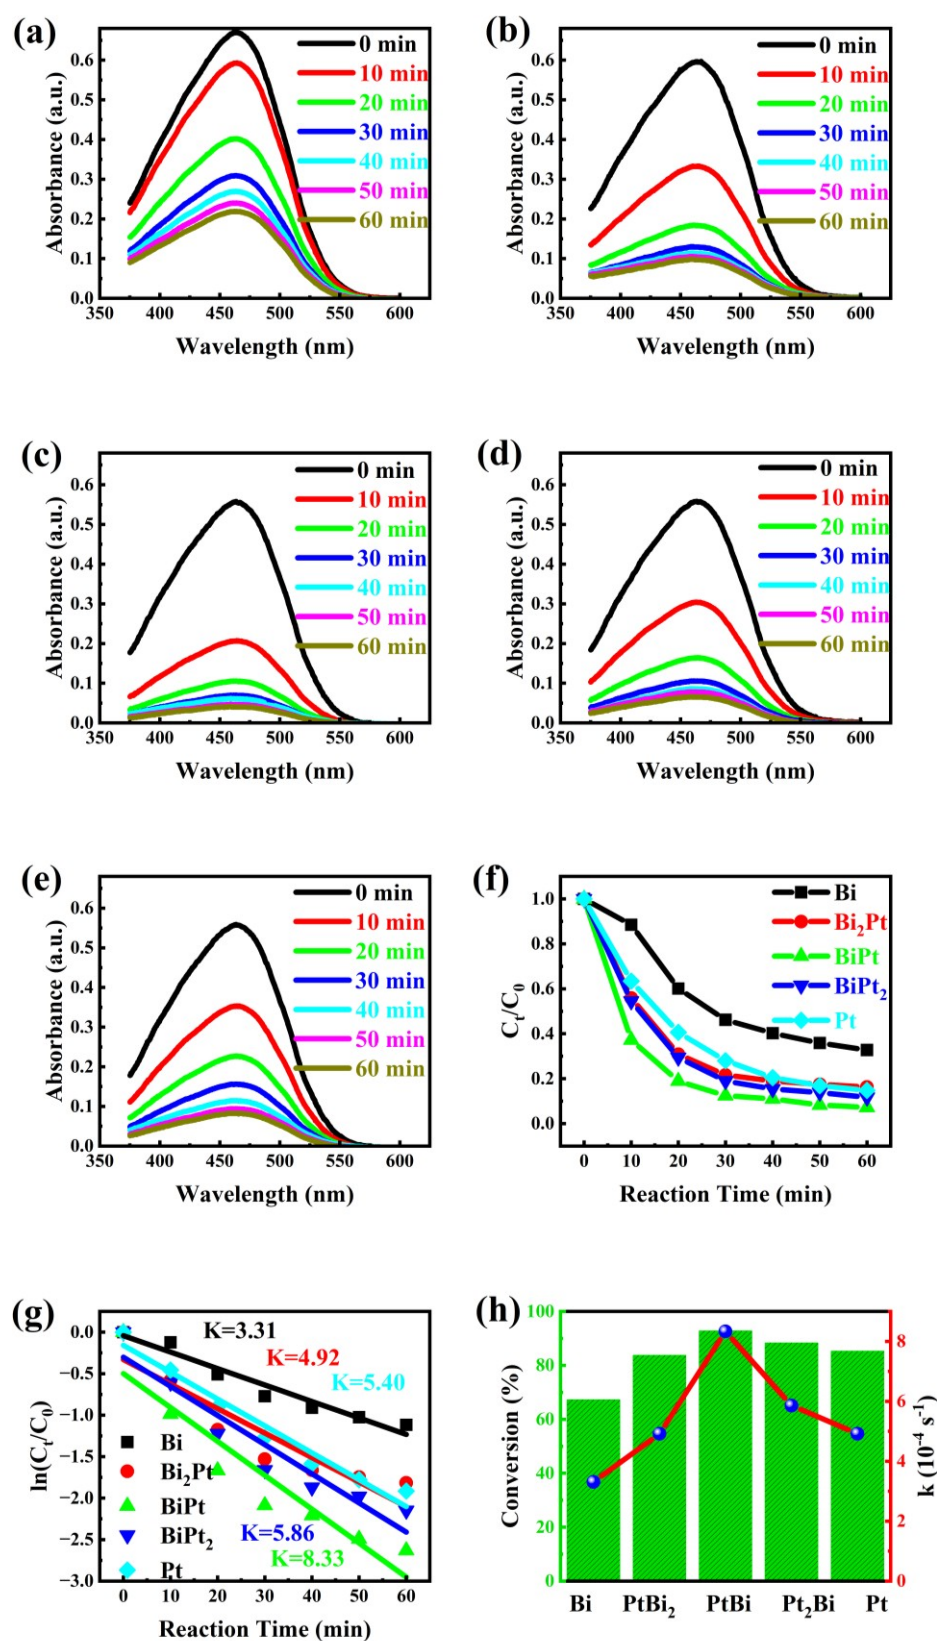

**Figure S7.** Time-dependent UV-visible absorption spectra of MO catalytic removal by monolithic catalyst with diverse metal ratios: (a) Bi; (b) PtBi<sub>2</sub>; (c) PtBi; (d) Pt<sub>2</sub>Bi; (e) Pt. (f) Rate curve and (g) linear fitting kinetic curve of MO catalytic removal by catalysts with diverse metal ratios of Pt and Bi. (h) Conversion and equilibrium constant  $k$  of MO catalytic removal by catalysts with diverse metal ratios in 60 min.



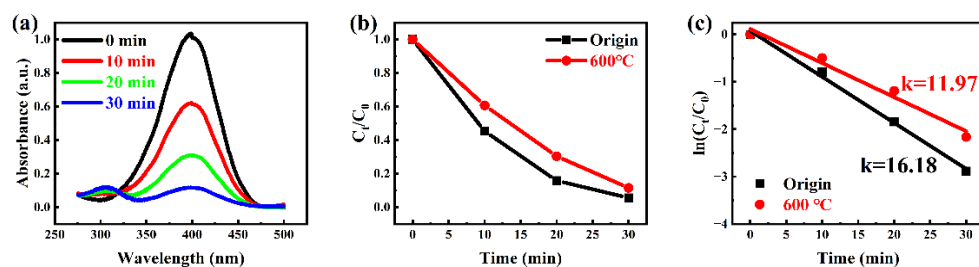

**Figure S8.** (a) Time-dependent UV-visible absorption spectra of 4-NP catalytic removal by hcp-PtBi/MgO/Mg monolithic catalyst treated by calcination at 600 °C for 2 h in Ar. (b) The corresponding rate curve and (c) linear fitting kinetic curve.

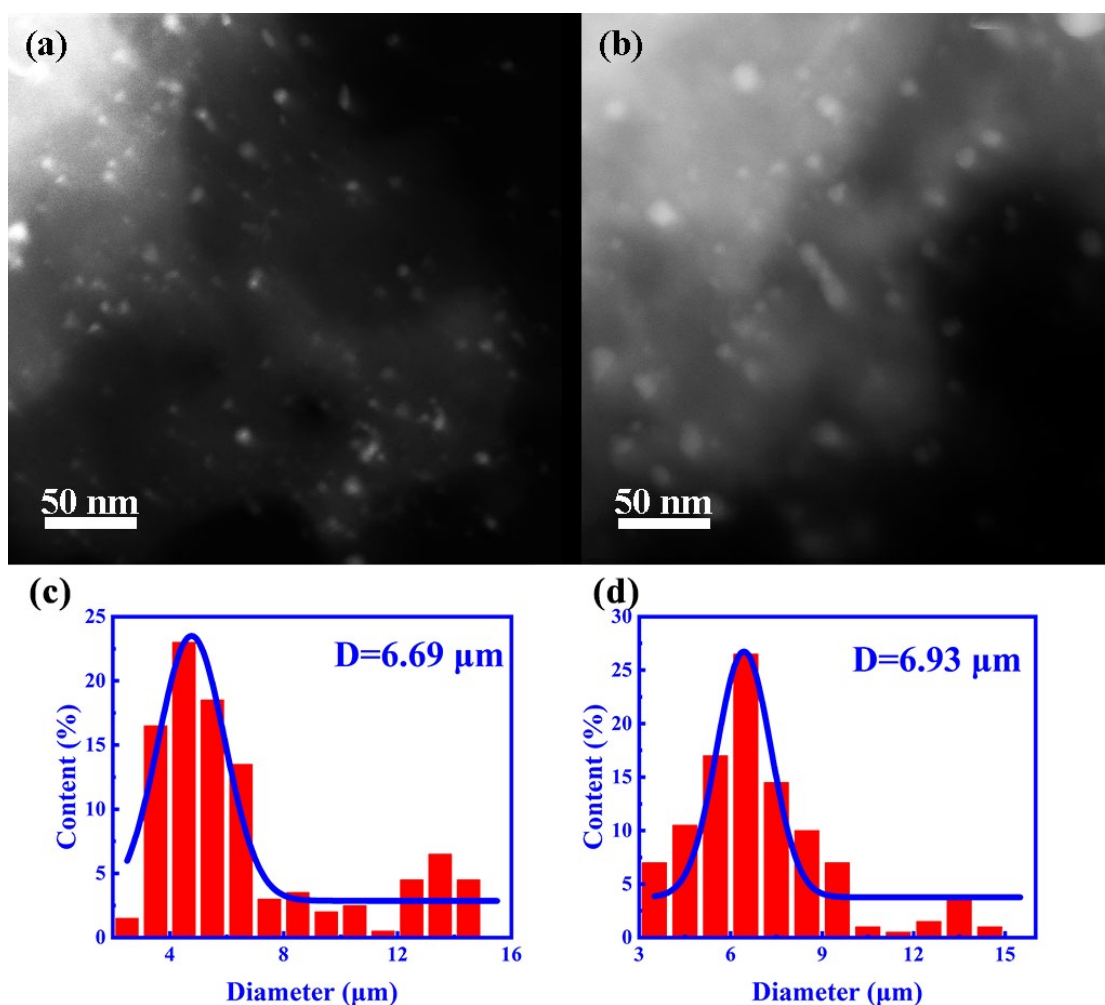

**Figure S9.** HAADF-STEM images of hcp-PtBi/MgO/Mg monolithic catalyst treated by (a) direct calcination at 600 °C and (b) powder calcination at 900 °C for 2 h in Ar. (c) and (d) are their corresponding NPs size distribution diagrams.

**Table S1.** The EDS results of hcp-PtBi/MgO/Mg monolithic catalyst.

| Element | Weight % | Atomic % |
|---------|----------|----------|
| O       | 51.10    | 60.95    |
| Mg      | 32.67    | 25.64    |
| Si      | 8.89     | 6.04     |
| F       | 7.34     | 7.37     |
| Totals  | 100.00   | 100.00   |

**Table S2.** The apparent activation energy ( $E_a$ ) for 4-NP catalytic removal using other catalysts containing noble metals reported in other works.

| Catalyst                                 | Support                        | Activation energy $E_a$ (kJ/mol) |
|------------------------------------------|--------------------------------|----------------------------------|
| PtBi                                     | MgO                            | 17.99                            |
| Pt <sub>1</sub> Co <sub>5</sub> /SAPO-34 | SAPO-34                        | 57.15                            |
| PtRu/C                                   | C                              | 51.5                             |
| Pt <sub>0.67</sub> Ni <sub>0.33</sub> /C | C                              | 33.0                             |
| PtNi@SiO <sub>2</sub>                    | SiO <sub>2</sub>               | 54.76                            |
| Pt/SAPO-34                               | SAPO-34                        | 61.88                            |
| Ag/Bi <sup>o</sup> -BiVO <sub>4</sub>    | BiVO <sub>4</sub>              | 36.6                             |
| Au-Fe <sub>3</sub> O <sub>4</sub>        | Fe <sub>3</sub> O <sub>4</sub> | 1656                             |

**Table S3.** The recyclability of hcp-PtBi/MgO/Mg catalyst and other catalysts prepared by various methods in other works.

| Nanoparticles | Support                                            | Method                                                    | Cycle Numbers |
|---------------|----------------------------------------------------|-----------------------------------------------------------|---------------|
| PtBi          | MgO                                                | PEO                                                       | 50            |
| PtNi          | reduced graphene oxide                             | one-pot co-reduction method                               | 4             |
| PtPd          | N-doped hollow carbon nanosphere                   | modified Stöber method                                    | 4             |
| RuPd          | H <sub>x</sub> MoO <sub>3-y</sub> Hybrid           | impregnation method                                       | 5             |
| PdAg          | polydopa-mine-functionalized kaolin                | co-reduction                                              | 10            |
| PtRh          | activated carbon                                   | incipient wetness impregnation and simultaneous reduction | 15            |
| RhCo          | nitrogen-doped porous carbon                       | thermal decomposition/reduction                           | 5             |
| Pd            | iron-rich fly ash@fly ash-derived SiO <sub>2</sub> | impregnation method                                       | 5             |
| Ag            | graphene oxide                                     | solid-state chemical reaction method                      | 7             |
| Pt            | micellar nanocomposites                            | chemical reaction method                                  | 5             |
| Au            | Hollow mesoporous CeO <sub>2</sub>                 | colloidal deposition                                      | 8             |
| Bi            | N-doped reduced graphene oxide                     | one-pot hydrazine-involved hydrothermal process           | 5             |
